# Supplementary material for: Expression of microRNAs and isomiRs in the porcine endometrium: implications for gene regulation at the maternal-conceptus interface
Source: PubMed Central journal article supplement (PMC4636777; doi:10.1186/s12864-015-2172-2), 2015-11-06
Supplement: 12864_2015_2172_MOESM4_ESM.pdf [file 12864_2015_2172_MOESM4_ESM.pdf]

**A**

Reference miR-9-1  
 Pre-miR-9-1 CGGGGUUGGUUGUUAUCUUUGGUUAUCUAGCUGUAUGAGUGGUGUGGAGUCUUCAUAAAAGCUAGAUAAACCGAAAGUAAAAUAACCCCA  
UCUUUGGUUAUCUAGCUGUAUG  
UCUUUGGUUAUCUAGCUGUAU  
UCUUUGGUUAUCUAGCUGUA

Reference miR-9-2  
 Pre-miR-9-2 GGAAGCGAGUUGUUAUCUUUGGUUAUCUAGCUGUAUGAGUGUAUUGGUCUUCAUAAAAGCUAGAUAAACCGAAAGUAAAAACUCCUUCA  
UCUUUGGUUAUCUAGCUGUAUG  
UCUUUGGUUAUCUAGCUGUAU  
UCUUUGGUUAUCUAGCUGUA

Reference miR-9  
 Pre-mir-9-3 CCCGUUUCUCUCUUUGGUUAUCUAGCUGUAUGAAGUGCCACAGAGCCGUCAUAAAAGCUAGAUAAACCGAAAGUAGAAAUGACU  
UCUUUGGUUAUCUAGCUGUAUG  
UCUUUGGUUAUCUAGCUGUAU  
UCUUUGGUUAUCUAGCUGUA

**B**

Reference miR-450a  
 Pre-miR-450a GUCUGUCAAAAGAAAGAUGC<sup>UAAACUGG</sup>UUUUGCGAUGUGUCCUAAUAUGCAGUAUAAAUAUAUUGGGAGCAUUUUGCAUGCAUGGUUUUGUAUCACUAUACAGAU  
 UUUUGCGAUGUGUCCUAAUAU  
UUUUGCGAUGUGUCCUAAUA  
UUUUGCGAUGUGUCCUAAU

Reference miR-450c-5p  
 Pre-miR-450c GGCACUAAACUAUUUUUGCGAUGUGUCCUAAUACGUAAUCUAAGUGUAUUGGGAACAUUUUGCAUUCGUAGUUUUGUGUC  
 UUUUGCGAUGUGUCCUAAUAC  
UUUUGCGAUGUGUCCUAAUA  
UUUUGCGAUGUGUCCUAAU

**C**

Pre-let-7a

Reference let-7a  
 CCCAGGUUGAGGUAGUAGGUUGUAUAGUUUAGAAUUGUAUCAAGGGAGAUAAACUGUACAGCCUCCUAGCUUUCCUUGGGU

UGAGGUAGUAGGUUGUAUAGUUUU  
 UGAGGUAGUAGGUUGUAUAGUUU  
 UGAGGUAGUAGGUUGUAUAGUU  
 UGAGGUAGUAGGUUGUAUAGU  
 UGAGGUAGUAGGUUGUAUAG  
 UGAGGUAGUAGGUUGUAUA  
UGAGGUAGUAGGUUGUAU

Pre-let-7c

Reference let-7c  
 UGUGUGCAUCCGGGUUGAGGUAGUAGGUUGUAUGGUUUAGAGUUACACCGUGGGAGUUAACUGUACAACCUUCUAGCUUUCCUUGGAGCACACU

UGAGGUAGUAGGUUGUAUGGUUU  
 UGAGGUAGUAGGUUGUAUGGUU  
 UGAGGUAGUAGGUUGUAUGGU  
 UGAGGUAGUAGGUUGUAUGG  
 UGAGGUAGUAGGUUGUAUG  
UGAGGUAGUAGGUUGUAU

**D**

Pre-miR-103

Reference miR-103  
 CUUACUGCCCUCGGCUUCUUUACAGUGCUGCCUUGUUGCAUAUGGAUCAAGCAGCAUUGUACAGGGCUAUGAAGGCACUGAG

AGCAGCAUUGUACAGGGCUAUGAAA  
 AGCAGCAUUGUACAGGGCUAUGAA  
 AGCAGCAUUGUACAGGGCUAUGA  
 AGCAGCAUUGUACAGGGCUAUG  
AGCAGCAUUGUACAGGGCUAU  
 CAGCAUUGUACAGGGCUAUGA

Pre-miR-107

Reference miR-107  
 UUCUCUCUGCUUUCAGCUUCUUUACAGUGUUGCCUUGUGGCAUGGAGUUCAAGCAGCAUUGUACAGGGCUAUCAAAGCACAGAGAGC

AGCAGCAUUGUACAGGGCUAUCA  
 AGCAGCAUUGUACAGGGCUAUC  
AGCAGCAUUGUACAGGGCUAU

**E**

Pre-miR-23a

CGGCUGGGGUUCCUGGGGAUGGGAUUUGCUGCCUGUCACAAAUCACAUGCCAGGGAUUCCAAUCGACC

Reference miR-23a-3p

AUCACAUGCCAGGGAUUCCAAU  
 AUCACAUGCCAGGGAUUCCAA  
 AUCACAUGCCAGGGAUUCCA  
 AUCACAUGCCAGGGAUUCC  
 AUCACAUGCCAGGGAUUUC  
 AUCACAUGCCAGGGAUUU  
 AUCACAUGCCAGGGAUU

Pre-miR-23b

CUCUGGCUGCUUGGGUUCCUGGCAUGCUGAUUUGUGACUUAAGAUUAAAAUCACAUGCCAGGGAUUACCACGCAGCCAC

Reference miR-23b-3p

AUCACAUGCCAGGGAUUACCAC  
 AUCACAUGCCAGGGAUUACCA  
 AUCACAUGCCAGGGAUUACC  
 AUCACAUGCCAGGGAUUAC  
 AUCACAUGCCAGGGAUU

**F**

Pre-miR-27a

UGGCCUGGGGAGCAGGGCUUAGCUGCUUGUGAGCAGGUCCACAGCAAGUCGUGUUCACAGUGGCUAAGUCCGCCCCCUGGA

Reference miR-27a

UUCACAGUGGCUAAGUCCGCC  
 UUCACAGUGGCUAAGUCCGC  
 UUCACAGUGGCUAAGUCCG  
 UUCACAGUGGCUAAGUCC  
 UUCACAGUGGCUAAGUUC

Pre-miR-27b

ACGAGGUGCAGAGCUUAGCUGAUUGGUGAACAGUGACUGGUUUCGCUUUGUUCACAGUGGCUAAGUUCUGCACCUGAAG

Reference miR-27b

GUUCACAGUGGCUAAGUUCUGC  
 UUCACAGUGGCUAAGUUCUGCAC  
 UUCACAGUGGCUAAGUUCUGCA  
 UUCACAGUGGCUAAGUUCUGC  
 UUCACAGUGGCUAAGUUCUG  
 UUCACAGUGGCUAAGUUCU  
 UUCACAGUGGCUAAGUUC

**G**

Pre-mir-339-1

Reference miR-339-5p  
 GCAGCCGCCGUCCUGUCCUCCAGGAGCUCACUUACCUUGGGCCGUGAGCUCUCGAGGCCAGAGCCCGUGUCUGCCUCU

UCCUGUCCUCCAGGAGCUCACU  
UCCUGUCCUCCAGGAGCUCAC  
UCCUGUCCUCCAGGAGCUCA

Pre-mir-339-2

Reference miR-339  
 UAAGACAAGGUCCUGUCCUCCAGGAGCUCACUGGUCCAAUAGAAGCAUAUAUACAAUUGGCUCUGAGGGGAGAUCCCGCUGUGGCU

UCCUGUCCUCCAGGAGCUCAU  
UCCUGUCCUCCAGGAGCUCA

**H**

Pre-miR-199a-2

Reference miR-199a-3p  
 CCCCGCCAACCCAGUGUUCAGACUACCUGUUCAGGGGGCUCUGAAUGUGUACAGUAGUCUGCACAUUGGUUAAGGCUGGGC

UACAGUAGUCUGCACAUUGGUUA  
UACAGUAGUCUGCACAUUGGUU  
UACAGUAGUCUGCACAUUGGU  
ACAGUAGUCUGCACAUUGGUUA  
ACAGUAGUCUGCACAUUGGUU  
ACAGUAGUCUGCACAUUGGU  
CAGUAGUCUGCACAUUGGUUA  
CAGUAGUCUGCACAUUGGUU

Pre-mir-199b

Reference miR-199b-3p  
 CCGUCUACCCAGUGUUUAGACUAUCUGUUCAGGACUCCCAAUUGUACAGUAGUCUGCACAUUGGUUAGGCUGG

UACAGUAGUCUGCACAUUGGUUA  
UACAGUAGUCUGCACAUUGGUU  
UACAGUAGUCUGCACAUUGGU  
ACAGUAGUCUGCACAUUGGUUA  
ACAGUAGUCUGCACAUUGGUU  
ACAGUAGUCUGCACAUUGGU  
CAGUAGUCUGCACAUUGGUUA  
CAGUAGUCUGCACAUUGGUU
