# Supplementary material for: Expression of microRNAs and isomiRs in the porcine endometrium: implications for gene regulation at the maternal-conceptus interface
Source: PubMed Central journal article supplement (PMC4636777; doi:10.1186/s12864-015-2172-2), 2015-11-06
Supplement: 12864_2015_2172_MOESM10_ESM.pdf [file 12864_2015_2172_MOESM10_ESM.pdf]

PUTATIVE TARGETS miR-140-3p(seed ACCACAG)

**ACVR2B 3' UTR**

```
          CAGGCACCAAGAUGG---GACACCAU   miR   (8mer)
                ||||           |||||
GCAGUGGAUCUUUGUCCUUUUUACUGUGGUAUUUUUAGAAAUGAGUG   hsa
GCAGUGGAUCUUUGUCCUUUUUACUGUGGUAUUUUUAGAAAUGAGUG   ptr
GCAGUGGAUCUUUGUCCUUUUUACUGUGGUAUUUUUAGAAAUGAGUG   mml
GC-GUGGCUCUUUGCUCUUUUUCCUGUGGUAUUUUUAGAAACGAGUG   mmu
UGCUGAAUCCUCGCUCCUUUUUCCUGUGGUAUUUUUAG-AAACGAGU   rno
GCAGUGGAUCUUUGUCCUUUUUACUGUGGUAUUUUUAGAAAUGAGUG   cfa
GCAGUGGAUCUUUGUCCUUUUUACUGUGGUAUUUUUAGAAAUGAGUG   eca
GCAGUGGAUCUUUGUUC-UUUUUACUGUGGUAUUUUUAGAAAUGAGUG   bta
GCAGUGGAUCUUUGUCCUUUUUACUAUAGUAUUUUUAGAAAUGAGUG   ssc
```

```
          CAGGCACCAAGAUGGGACACCAU       miR   (8mer/7mer-A1)
                |||||
UGGUUUGAUUUUGUGCUGUGGUA-UUUUUUUUCCCUUAGAAUAAUUUU   hsa
UGGUUUGAUUUUGUGCUGUGGUA-UUUUUUCUCCCUUAGAAUAAUUUU   ptr
UGGUUUGAUUUUGUGCUGUGGUA-UUUUUUCUCCCUUGGAAUAAUUUU   mml
--AUCUGAUUUUGUGCUGUGGUA--UUUUUCUUGUCUCAGAAUACUUUC   mmu
-----UUUUUGUGCUGUGGUAUUUUUUUUUGUUUCAGACUACUUUC   rno
----AUUAUUUUUGUGCUGUGGUA-UUUUUUCUCCCUUGGAAUAAUUUU   cfa
----ACUAUUUUUGUGCUGUGGUA-UUUUUUCUCCCUUGGAAUAAUUUU   eca
UAAAACUAUUUUUGUGCUGUGGUAUUUUUUCCUCCCUUGGAAUAAUUUU   bta
UAAAGU-AUUUUUGUGGUGUGGUA-UUUUUUCUCCCUUGGAAUAAUUUU   ssc
```

PUTATIVE TARGETS isomiR mir-140-3p (seed CCACAGG)

**LPAR2 3' UTR**

CAGGCACCAAGAUGGGACACCA isomiR (8mer/7mer-A1)

|||||||

|                                             |     |
|---------------------------------------------|-----|
| UCA--CUGCGU-AUCCUUGGUAAGCCUGUGGACUGGUUCCUG  | hsa |
| UCA--CUGCGU-AUCCUUGGUAAGCCUGUGGACUGGUUCCUG  | ptr |
| UCA--CUGUGU-AUCCUUGGUAAGCCUGUGGACUG-UUCCUG  | mml |
| UUA--CUGUGUUAUCUCUGG--AUGUCUGUGGACUGCUGCUUC | mmu |
| UUA--CUGUAC-AUCUCUGGC-AUGUCUGUGGACUGCUGCUUC | rno |
| UUA--CCACUC-AUCCCUGGUA AACCCUGUGGACUACUCCCU | cfa |
| UUA--CUGCAU-AUCCCUGGUAACUCUGUGGACUGCUAUCUC  | eca |
| UUUUUCUGCAC-AUGCCUGGUAACCCUGUGGACUGCUUUCUU  | bta |
| UUA--CCACAC-AUCCCUGGUAACUCUGUGGACUGCUUCCUU  | ssc |

**LIF 3' UTR**

CAGGCACCAAGAUGGGACACCA isomiR (7mer-m8)

|||||||

|                                             |     |
|---------------------------------------------|-----|
| UUUGAUGAAUGUACCCUGUGGGGAUGUUUCAUACUGACAGAUU | hsa |
| UUUGAUGAAUGUACCCUGUGGGGAUGUUUCAUACUGACAGAUU | ptr |
| UU-GAUGAAUGUACCCUGUGGGGAUGUUUCAUACUGACAGAUU | mml |
| UUUGAUGAAUGUACCCUGUGGGGAUGUUUCAUACUGACAGAUU | mmu |
| UUUGAUGAAUGUACCCUGUGGGGAUGUUUCAUACUGACAGAUU | rno |
| UUUGAUGAAUGUACCCUGUGGGGAUGUUUCAUACUGACAGAUU | cfa |
| UUUGAUGAAUGUACCCUGUGGGGAUGUUUCAUACUGACAGAUU | eca |
| UUUGAUGAAUGUACCCUGUGGGGAUGUUUCAUACUGACAGAUU | bta |
| UUUGAUGAAUGUACCCUGUGGGGAUGUUUCAUACUGACAGGUU | ssc |

COMMON PUTATIVE TARGETS miR-140-3p (seed ACCACAG) and isomiR miR-140-3p(seed CCACAGG)

**KCNMA1 3' UTR**

CAGGCACCAAGAUGGGACACCAU miR (7mer-m8/6mer)

```
          |||||
GUAGGCAUUGUCCUGCAGUGAUUUGUCGGACUGUGGUUACUCUG   hsa
GUAGGCAUUGUCCUGCAGUGACUUGUCAGACUGUGGUUACUCUG   ptr
GUAGGCAUUGUCCUGCAGUGACUUGUCGGACUGUGGUUACUCUG   mml
GUAGGCGUUGUCCUGCAGUGACUUGUCAGACUGUGGUUACUCUG   mmu
GUAGGCAUUGUCCUGCAGUGACCUGUCGGACUGUGGUUACUCUG   rno
GUAGGCGCCGUCCUGAAGUGACUUGUCAGACUGUGGUUACCCUG   cfa
AUAAGCGCCAUCCUAAAAGUGACUUGUCAGACUGUGGCUACCGUG   eca
GUAGGCGUCGUCCUGAAGUGACUUGUCAGACUGUGGUUACCCUG   bta
GUAGGUGCUGUCCUGAAGUGACUUGUCAGACCGUGGUUACCCUG   ssc
```

CAGGCACCAAGAUGGGACACCAU miR (8mer)

```
          |||||
CUUUGGGCCAUGA-CCUGUGGUACCUAGUUAUGGUAGUGCAAU   hsa
CUUUGGGCCAUGA-UCUGUGGUACCUAGUUAUGGUAGUGCAAU   ptr
CUUUGGACCAUGA-CCUGUGGUACCUAGUUAUGGUAGUGCAAU   mml
CUUUAGGCCAUGAUUCUGUGGUACCUAGUUAUGAUAGUACAAU   mmu
CUUUAGGCCAUGACUCAGUGGU-CCUAGUUAUGAUAGUAAAAU   rno
CUUUAGGCCAUGACCCUGUGGCACUUAGU-AUAUUAGUGCAAU   cfa
CUUUAGGCCAUGACCCUGUGGUACCUAGU-AUGUUAGUGCAAU   eca
-----GGCCAUGACCCAUUGGUA-CAUAGUAUGUUACUGCAAU   bta
CAUUAGGCCAUGACCCUGUGGUACCUAGU-AUGUUAGUGCAAU   ssc
```

CAGGCACCAAGAUGGGACACCA isomiR (7mer-m8)

```
          |||||
UUAACUCUUUGGGCCAUGA-CCUGUGGUACCUAGUUAUGGUAGU   hsa
UUAACUCUUUGGGCCAUGA-UCUGUGGUACCUAGUUAUGGUAGU   ptr
UUAACUCUUUGGACCAUGA-CCUGUGGUACCUAGUUAUGGUAGU   mml
UGAACUCUUUAGGCCAUGAUUCUGUGGUACCUAGUUAUGAUAGU   mmu
UGAACUCUUUAGGCCAUGACUCAGUGGU-CCUAGUUAUGAUAGU   rno
UUAUUUCUUUAGGCCAUGACCCUGUGGCACUUAGU-AUAUUAGU   cfa
UUAUUUCUUUAGGCCAUGACCCUGUGGUACCUAGU-AUGUUAGU   eca
-----
CUAUUCCAUUAGGCCAUGACCCUGUGGUACCUAGU-AUGUUAGU   bta
CUAUUCCAUUAGGCCAUGACCCUGUGGUACCUAGU-AUGUUAGU   ssc
```

**SIRT1 3' UTR**

CAGGCACCAAGAUGGGACACCAU miR (8mer)  
| | | | | | | |  
UGUUUAAAUAACCUAUCACUGUGGUAGAGCUUGCAUUGA-UCUUUUCCAC hsa  
UGUUUAAAUAACCUAUCACUGUGGUAGAGCUUGCAUUGA-UCUUUUCCAC ptr  
--UA-AAUAC-CUAUCACUGUGGUAGAGCUUGCAUUGA-UCUUUUCCAC mml  
UAAUUAAAUAACCUAUCACUGUGGUAGAGCCUCAUAGA-UCUUCACCAC mmu  
UAAUUAAAUAACCUAUCACUGUGGUAGAGCCUCAUAGA-UCUUCACCAC rno  
UGUUUAAAUAACCUAUCACUGUGGUAGAGCUUGCAUUGCUUCUUUCCAC cfa  
UGUUUAAAUAACCUAUCACUGUGGUAGAGCAUGCACUGAUCCUUUCCAC eca  
UGUUUAAACACCUAUCACUGUGGUAGAGCUUGCAUUGA-UCCUUUCCAC bta  
UGUUUAAAUAACCUAUCACUGUGGUAGAGCUUGCAUUGAUCCUUUCCAC scc

CAGGCACCAAGAUGGGACACCA isomiR (7mer-m8)  
| | | | | | | |  
CGUUCAAAUGAAGAUGG-CUUUUGUACUCCUGUGGACAUGUAGCAAUG hsa  
CGUUCAAAUGAAGAUGG-CUUUUGUACUCCUGUGGACAUGUAGUAAUG ptr  
UGUUCAAAUGAAGAUGG-CUUUUGUACUCCUGUGGACAUGUAGUAAUG mml  
UGC-----AUCG-UUUUUGUACUUGCUGCAGAC-GUG--G-UAA mmu  
UGC-----AUGGUUUUUUGUACUUGCUGCAGAC-GUG--G-UAA rno  
UGU-----UGAAGAUGG-CUUUUGUACUCCUGUGGACAUGUAGUAAUG cfa  
UGUUCAAAUGAAGAUGG-CUUUUGUACUCCUGUGGACAUGUAGUAAUG eca  
CGUUCAAAUGAAGAUCG-CUUUUGUACUCCUGUGGACAUGUAGUAAUG bta  
UGUUCAAAUGAAGAUGG-CUUUUGUACUCCUGUGGACAUGUGGUAUG ssc
