# Supplementary material for: Expression of microRNAs and isomiRs in the porcine endometrium: implications for gene regulation at the maternal-conceptus interface
Source: BMC Genomics. 2015 Nov 6;16:906. doi: 10.1186/s12864-015-2172-2 (PMC4636777; doi:10.1186/s12864-015-2172-2)
Supplement: Additional file 9: Table S6. — Results of IPA functional annotations and processes enriched with common targets for canonical miR-140-3p (seed sequence ACCACAG) and its 5’ isomiR with seed sequence CCACAGG. (XLSX 21 kb) [file 12864_2015_2172_MOESM9_ESM.xlsx]

## Sheet: Disease and Functions mir-140-3
Supplemental Table S6. Results of IPA functional annotations and processes enriched with common targest for reference/canonical miR-140 (seed sequence ACCACAG) and its isomiR with different seed sequence (CCACAGG).
Function Annotation	p-value	Molecules	# Molecules
proliferation of cells	0.00252	ADAM17, ADAMTS5, BAG1, EGR3, GPC3, HBP1, HIC1, HSPG2, KCNMA1, NCAN, PTCH1, RAP1B, RC3H1, RUSC1, SIRT1, SPRY4, SRGAP1, SYN1, TEAD1, TLE4, TRPS1, TYRO3, USP9X	23
organismal death	1.03e-05	ADAM17, APLP2, BAG1, EGR3, GPC3, HIC1, HSPG2, HYOU1, KCNMA1, KIF5A, NDST1, NOVA1, PDSS2, PTCH1, RAP1B, RC3H1, SATB2, SCN1A, SIRT1, SPRY4, TEAD1, TRPS1	22
cell death	0.00182	ADAM17, BAG1, DDN, EGR3, GPC3, HIC1, HSPG2, HYOU1, KCNMA1, KIF5A, LPHN2, NDST1, NOVA1, PI4KB, PTCH1, RAP1B, SCN1A, SIRT1, TEAD1, TNRC6A, TRPS1, TYRO3	22
apoptosis	0.00138	ADAM17, BAG1, DDN, EGR3, GPC3, HIC1, HSPG2, HYOU1, KCNMA1, LPHN2, NDST1, NOVA1, PTCH1, RAP1B, SIRT1, TEAD1, TNRC6A, TRPS1, TYRO3	19
differentiation of cells	0.000372	ADAM17, BAG1, BSN, EGR3, GPC3, HBP1, HSPG2, KCNMA1, NDST1, PTCH1, RC3H1, SATB2, SIRT1, SPRY4, SRGAP1, TRPS1, TYRO3, ZHX3	18
necrosis	0.015	ADAM17, BAG1, DDN, EGR3, GPC3, HIC1, HYOU1, LPHN2, NDST1, NOVA1, PI4KB, PTCH1, SCN1A, SIRT1, TRPS1, TYRO3	16
migration of cells	0.00176	ADAM17, APLP2, BAG1, GPC3, HIC1, HYOU1, KCNMA1, NDST1, RAP1B, SATB2, SIRT1, SPRY4, SRGAP1, TYRO3, USP9X	15
expression of RNA	0.0148	ATXN7L3, BAG1, BAHD1, DDN, HBP1, HIC1, PTCH1, SATB2, SIRT1, SOX12, TEAD1, TLE4, TRPS1, ZHX3	14
transcription of DNA	0.002	ATXN7L3, BAG1, BAHD1, DDN, HIC1, PTCH1, SATB2, SIRT1, SOX12, TEAD1, TLE4, TRPS1, ZHX3	13
transcription of RNA	0.0114	ATXN7L3, BAG1, BAHD1, DDN, HIC1, PTCH1, SATB2, SIRT1, SOX12, TEAD1, TLE4, TRPS1, ZHX3	13
morphology of cells	0.018	ADAM17, APLP2, EGR3, HBP1, HSPG2, KCNMA1, KIF5A, NDST1, RC3H1, SIRT1, SYN1, TRPS1, TYRO3	13
perinatal death	5.62e-07	ADAM17, APLP2, GPC3, HSPG2, KIF5A, NDST1, RAP1B, RC3H1, SATB2, SIRT1, SPRY4, TRPS1	12
morphology of head	2.23e-05	ADAM17, GPC3, HSPG2, NDST1, PTCH1, SATB2, SIRT1, SOX12, SPRY4, SYN1, TRPS1, TYRO3	12
development of body trunk	0.00022	ADAM17, EGR3, GPC3, HSPG2, NDST1, PTCH1, RC3H1, SIRT1, SOX12, SPRY4, TEAD1, TRPS1	12
size of body	0.000146	ADAM17, APLP2, GPC3, HSPG2, KCNMA1, PTCH1, RAP1B, RC3H1, SCN1A, SIRT1, SPRY4	11
development of head	0.000222	ADAM17, APLP2, GPC3, HSPG2, NDST1, PTCH1, SATB2, SIRT1, SPRY4, TYRO3, USP9X	11
activation of DNA endogenous promoter	0.00199	BAG1, DDN, HIC1, PTCH1, SATB2, SIRT1, SOX12, TEAD1, TLE4, TRPS1, ZHX3	11
proliferation of neuronal cells	1.94e-05	ADAM17, BAG1, EGR3, NCAN, PTCH1, RAP1B, RUSC1, SIRT1, SRGAP1, SYN1	10
development of cardiovascular system	0.00408	ADAM17, EGR3, HSPG2, KCNMA1, NDST1, PTCH1, RAP1B, SIRT1, SPRY4, TEAD1	10
growth of neurites	1.92e-05	ADAM17, BAG1, EGR3, NCAN, RAP1B, RUSC1, SIRT1, SRGAP1, SYN1	9
development of central nervous system	0.000242	APLP2, HSPG2, NDST1, PTCH1, SATB2, SOX12, SPRY4, TYRO3, USP9X	9
neurotransmission	4.94e-05	BSN, EGR3, KCNMA1, KIF5A, NOVA1, SCN1A, SCN3A, SYN1	8
vasculogenesis	0.00595	ADAM17, EGR3, HSPG2, KCNMA1, NDST1, RAP1B, SIRT1, SPRY4	8
morphology of skull	5.06e-06	GPC3, HSPG2, NDST1, PTCH1, SATB2, SOX12, SPRY4	7
respiratory system development	9.45e-05	ADAM17, GPC3, NDST1, PTCH1, RC3H1, SPRY4, TRPS1	7
outgrowth of neurites	0.000344	ADAM17, BAG1, EGR3, RAP1B, RUSC1, SRGAP1, SYN1	7
formation of brain	0.00125	APLP2, HSPG2, NDST1, PTCH1, SPRY4, TYRO3, USP9X	7
catabolism of protein	0.0033	ADAM17, ADAMTS5, BAG1, GPC3, HSPG2, SIRT1, USP9X	7
angiogenesis	0.0164	ADAM17, HSPG2, KCNMA1, NDST1, RAP1B, SIRT1, SPRY4	7
morphology of mandible	6.03e-08	GPC3, HSPG2, NDST1, PTCH1, SATB2, SPRY4	6
formation of lung	0.000337	ADAM17, GPC3, NDST1, RC3H1, SPRY4, TRPS1	6
synaptic transmission	0.000658	BSN, EGR3, KCNMA1, KIF5A, NOVA1, SYN1	6
apoptosis of neurons	0.00283	BAG1, HYOU1, NOVA1, PTCH1, SIRT1, TYRO3	6
neonatal death	0.00316	ADAM17, KIF5A, NDST1, RC3H1, SIRT1, TRPS1	6
transactivation of RNA	0.0096	ADAMTS5, BAG1, EGR3, HBP1, SIRT1, TRPS1	6
growth Failure	0.016	APLP2, GPC3, RC3H1, SIRT1, SPRY4, TEAD1	6
differentiation of connective tissue cells	0.0186	GPC3, HSPG2, PTCH1, SIRT1, TRPS1, ZHX3	6
morphology of respiratory tract	1.24e-05	ADAM17, HSPG2, NDST1, SATB2, SPRY4	5
action potential of neurons	2.92e-05	EGR3, KCNMA1, SCN1A, SCN3A, SYN1	5
formation of forebrain	0.000802	APLP2, NDST1, PTCH1, SPRY4, TYRO3	5
synaptic transmission of cells	0.00097	BSN, KCNMA1, KIF5A, NOVA1, SYN1	5
locomotion	0.00404	APLP2, BAG1, KCNMA1, NOVA1, SCN1A	5
sprouting	0.00648	BSN, EGR3, HSPG2, NDST1, SPRY4	5
colony formation of cells	0.0201	ADAM17, BAG1, GPC3, SPRY4, TYRO3	5
morphology of mouth	0.000579	NDST1, SATB2, SPRY4, TRPS1	4
mineralization of bone	0.00103	GPC3, HSPG2, SATB2, SOX12	4
coagulation	0.00256	APLP2, HSPG2, SIRT1, TYRO3	4
migration of neurons	0.00648	ADAM17, SATB2, TYRO3, USP9X	4
cell surface receptor linked signal transduction	0.0133	GPC3, NDST1, PTCH1, TRPS1	4
degeneration of cells	0.0226	KCNMA1, KIF5A, SIRT1, TYRO3	4
overgrowth syndrome	0.000615	GPC3, SCN1A, SCN3A	3
smoothened signaling pathway	0.00314	GPC3, NDST1, PTCH1	3
reflex	0.00391	APLP2, KCNMA1, SCN1A	3
cyanosis	0.00578	ADAM17, KIF5A, NDST1	3
cartilage development	0.00727	HSPG2, PTCH1, SATB2	3
morphogenesis of skeletal system	0.00781	HSPG2, NDST1, SATB2	3
cell death of germ cells	0.00824	ADAM17, SIRT1, TYRO3	3
localization of protein	0.0152	HSPG2, HYOU1, PTCH1	3
coagulation of blood	0.0175	APLP2, HSPG2, TYRO3	3
developmental process of synapse	0.0182	BSN, NCAN, SYN1	3
conditioning	0.0218	KCNMA1, SCN1A, SYN1	3
limb development	0.0218	GPC3, PTCH1, SIRT1	3
transport of monovalent inorganic cation	0.0257	HBP1, KCNMA1, SCN1A	3
accumulation of extracellular matrix	0.000609	ADAM17, ADAMTS5	2
release of protein	0.000609	BAG1, LPHN2	2
deacetylation of protein	0.000701	NDST1, SIRT1	2
atresia of vagina	0.0008	GPC3, TYRO3	2
anti-tumor response	0.00126	HYOU1, SIRT1	2
hypoplasia of mandible	0.00126	GPC3, NDST1	2
aggregation of vesicles	0.00197	PTCH1, SYN1	2
cell rolling of neutrophils	0.0023	ADAM17, NDST1	2
branching of blood vessel	0.00428	HSPG2, SPRY4	2
morphogenesis of hindlimb	0.00524	GPC3, PTCH1	2
atrial septal defect	0.00602	GPC3, SIRT1	2
migration of gonadal cell lines	0.00628	ADAM17, APLP2	2
progressive supranuclear palsy	0.00656	SCN1A, SCN3A	2
branching of metanephric bud	0.00741	GPC3, TRPS1	2
deubiquitination of protein	0.00771	USP34, USP9X	2
double outlet right ventricle	0.00771	GPC3, SOX12	2
mating behavior	0.00771	APLP2, SCN1A	2
formation of germinal center	0.00863	ADAM17, RC3H1	2
length of long bones	0.00863	ADAM17, HSPG2	2
walking	0.00863	KCNMA1, SCN1A	2
bleeding of tissue	0.00927	ADAM17, TYRO3	2
morphogenesis of embryonic skeleton	0.00927	HSPG2, SATB2	2
mass of brain	0.00993	SCN1A, SIRT1	2
quantity of rib	0.011	GPC3, PTCH1	2
righting reflex	0.011	APLP2, SCN1A	2
quantity of synapse	0.012	APLP2, BSN	2
excitatory postsynaptic potential of neurons	0.0124	EGR3, SYN1	2
migration of hepatoma cell lines	0.0128	ADAM17, RAP1B	2
formation of skull	0.0139	GPC3, NDST1	2
morphogenesis of metanephric bud	0.0147	GPC3, PTCH1	2
estrous cycle	0.0159	SIRT1, TYRO3	2
processing of protein fragment	0.0168	ADAM17, PTCH1	2
formation of spleen	0.0194	ADAM17, RC3H1	2
morphology of tooth	0.0212	SATB2, SPRY4	2
injury of nervous system	0.0217	HYOU1, SIRT1	2
activation of neurons	0.0231	KCNMA1, SIRT1	2
patterning of embryo	0.0236	PTCH1, SATB2	2
morphogenesis of embryonic limb	0.0241	GPC3, PTCH1	2
microphthalmia	0.0251	NDST1, SIRT1	2
quantity of vesicles	0.0251	BSN, SYN1	2
accumulation of cell-associated matrix	0.00264	ADAMTS5	1
action potential of interneurons	0.00264	SCN1A	1
branching of microvasculature	0.00264	NDST1	1
delay in formation of synapse	0.00264	SYN1	1
delay in outgrowth of axons	0.00264	SYN1	1
depletion of fatty acid	0.00264	SIRT1	1
depletion of glycerol	0.00264	SIRT1	1
deterioration of basement membrane	0.00264	HSPG2	1
diameter of sensory axons	0.00264	KIF5A	1
diapedesis of peripheral blood monocytes	0.00264	ADAM17	1
discharge of cochlear nerve	0.00264	BSN	1
exocytosis by endocrine cell lines	0.00264	LPHN2	1
eyelid reflex	0.00264	KCNMA1	1
G1 phase of neural tube cells	0.00264	PTCH1	1
homeostasis of vascular endothelial cells	0.00264	SIRT1	1
hypertrophy of epididymal fat	0.00264	SIRT1	1
hypertrophy of hibernating gland	0.00264	SIRT1	1
hypogonadotropic hypogonadism 17 without anosmia	0.00264	SPRY4	1
inactivation of synapse	0.00264	BSN	1
internalization of lipoprotein	0.00264	HSPG2	1
metabolism of aldosterone	0.00264	KCNMA1	1
mitotic entry of liver cells	0.00264	SIRT1	1
morphology of presynaptic terminals	0.00264	SYN1	1
neonatal inflammatory skin and bowel disease	0.00264	ADAM17	1
primary coenzyme Q10 deficiency type 3	0.00264	PDSS2	1
quantity of microfibrils	0.00264	HSPG2	1
quantity of ribbon synapse	0.00264	BSN	1
release of ADP	0.00264	BAG1	1
release of protein fragment	0.00264	BAG1	1
senescence of articular chondrocytes	0.00264	SIRT1	1
severe bleeding	0.00264	HSPG2	1
size of mossy fiber boutons	0.00264	SYN1	1
area of external granular layer	0.00527	PTCH1	1
association of synaptic vesicles	0.00527	SYN1	1
atrophy of exocrine region of pancreas	0.00527	SIRT1	1
binding of lipoprotein	0.00527	HSPG2	1
colony formation of mesothelioma cells	0.00527	GPC3	1
commitment of amacrine cells	0.00527	SATB2	1
contractility of dermal fibroblasts	0.00527	ADAMTS5	1
dissociation of ADP	0.00527	BAG1	1
expansion of neuroepithelium	0.00527	HSPG2	1
fibrinogenesis	0.00527	HSPG2	1
formation of intrafusal muscle fibers	0.00527	EGR3	1
hyperplasia of granule cell precursors	0.00527	PTCH1	1
infiltration of M2 macrophages	0.00527	SIRT1	1
lifespan of heart cell lines	0.00527	SIRT1	1
metabolism of thymocytes	0.00527	EGR3	1
neurotransmission of GABAergic neurons	0.00527	SCN1A	1
plasticity of collateral synapses	0.00527	SIRT1	1
posttetanic potentiation of hippocampal neurons	0.00527	SYN1	1
quantity of neuromuscular synapse	0.00527	APLP2	1
survival of neural tube cells	0.00527	PTCH1	1
attachment of radial glial cells	0.00789	HSPG2	1
catabolism of lipoprotein	0.00789	HSPG2	1
density of microvasculature	0.00789	NDST1	1
endocytosis by macrophages	0.00789	HYOU1	1
enlargement of seminal vesicle	0.00789	SIRT1	1
excision repair of pyrimidine dimer	0.00789	SIRT1	1
formation of B-cell follicle	0.00789	ADAM17	1
formation of ribbon synapse	0.00789	BSN	1
hydrolysis of NAD+	0.00789	SIRT1	1
infiltration of M1 macrophages	0.00789	SIRT1	1
mass of eye	0.00789	HSPG2	1
morphogenesis of Wolffian duct	0.00789	GPC3	1
oxidative stress response of kidney	0.00789	PDSS2	1
proliferation of neural tube cells	0.00789	PTCH1	1
stabilization of cytoplasmic aggregates	0.00789	TYRO3	1
sulfation of chondroitin sulfate	0.00789	NDST1	1
thin rib	0.00789	TRPS1	1
translocation of Golgi vesicles	0.00789	BSN	1
umbilical hernia	0.00789	GPC3	1
cross-linkage of microtubules	0.0105	SYN1	1
development of intervertebral disc	0.0105	HSPG2	1
diameter of humerus	0.0105	HSPG2	1
formation of Golgi vesicles	0.0105	BSN	1
hypertrichosis	0.0105	TRPS1	1
initiation of outgrowth of neurites	0.0105	SRGAP1	1
morphology of prostate cell lines	0.0105	SIRT1	1
postural reflex	0.0105	SCN1A	1
synaptic transmission of photoreceptors	0.0105	BSN	1
apoptosis of neural tube cells	0.0131	PTCH1	1
clustering of synaptic vesicles	0.0131	SYN1	1
depletion of triacylglycerol	0.0131	SIRT1	1
development of transitional B lymphocytes	0.0131	ADAM17	1
formation of cartilage nodule	0.0131	PTCH1	1
hydrolysis of inositol phosphate	0.0131	PI4KB	1
inflammation of macrophages	0.0131	SIRT1	1
injury of axons	0.0131	SIRT1	1
quantity of dense-core vesicles	0.0131	BSN	1
quantity of heparan sulfate	0.0131	NDST1	1
vascularization of wound	0.0131	HYOU1	1
blinking	0.0157	KCNMA1	1
context memory	0.0157	SCN1A	1
deadenylation of mRNA	0.0157	TNRC6A	1
development of collecting tubule	0.0157	GPC3	1
formation of joint	0.0157	TRPS1	1
mobilization of triacylglycerol	0.0157	SIRT1	1
morphogenesis of embryonic skull vault	0.0157	NDST1	1
phagocytosis by Sertoli cells	0.0157	TYRO3	1
quantity of muscle spindle	0.0157	EGR3	1
sulfation of heparan sulfate	0.0157	NDST1	1
thermal burn	0.0157	SCN1A	1
tubulation of skin cell lines	0.0157	RAP1B	1
animal rolling	0.0183	APLP2	1
biosynthesis of ubiquinone	0.0183	PDSS2	1
depletion of mitochondrial DNA	0.0183	PDSS2	1
development of mandible	0.0183	GPC3	1
differentiation of AT2 cells	0.0183	ADAM17	1
differentiation of granule cell precursors	0.0183	PTCH1	1
inflammation of epididymal fat	0.0183	SIRT1	1
lifespan of lung cell lines	0.0183	SIRT1	1
migration of fibroblast-like synoviocytes	0.0183	KCNMA1	1
quantity of Cajal-Retzius neurons	0.0183	APLP2	1
quantity of PML nuclear bodies	0.0183	SIRT1	1
rotarod-walking behavior	0.0183	BAG1	1
segregation of cells	0.0183	APLP2	1
binding of megakaryocytes	0.0209	RAP1B	1
eyeblink conditioning	0.0209	KCNMA1	1
generation of follicular T helper cells	0.0209	RC3H1	1
homeostasis of neurons	0.0209	TYRO3	1
homeostasis of TREG cells	0.0209	RC3H1	1
oxidation of fat	0.0209	SIRT1	1
propagation of action potential	0.0209	SCN1A	1
quantity of phosphatidylinositol 4-phosphate	0.0209	PI4KB	1
rupture of blood vessel	0.0209	HSPG2	1
secretion of thyroid hormone	0.0209	SIRT1	1
size of tongue	0.0209	SATB2	1
sulfation of protein	0.0209	NDST1	1
synaptic transmission of superior cervical ganglion neurons	0.0209	BSN	1
arrest in G1 phase of lung cell lines	0.0235	SIRT1	1
cleavage of embryo	0.0235	APLP2	1
conduction of cells	0.0235	KCNMA1	1
development of medulloblastoma	0.0235	PTCH1	1
fusion of synaptic vesicles	0.0235	BSN	1
lifespan of fibroblast cell lines	0.0235	SIRT1	1
morphogenesis of viscerocranium	0.0235	NDST1	1
permeability of skin cell lines	0.0235	RAP1B	1
tinnitus	0.0235	SCN1A	1
urination	0.0235	KCNMA1	1
arrest in development of thymocytes	0.0261	EGR3	1
binding of TATA box	0.0261	TEAD1	1
